# Supplementary material for: Fabrication of mesoporous silica nanoparticles hybridised with fluorescent AIE-active quinoline-malononitrile for drug delivery and bioimaging
Source: Royal Society of Chemistry journal article supplement (doi:10.1039/c4ra10114f), 2014-10-27
Supplement: c4ra10114f1.pdf [file c4ra10114f1.pdf]

## Fabrication of Mesoporous Silica Nanoparticles Hybridized with Fluorescent AIE-active Quinoline-malononitrile for Drug Delivery and Bioimaging

Si Yao<sup>§a</sup>, Andong Shao<sup>§b</sup>, Wenru Zhao<sup>\*a</sup>, Shaojia Zhu<sup>c</sup>, Ping Shi<sup>c</sup>, Zhiqian Guo<sup>\*b</sup>, Weihong Zhu<sup>b</sup> and Jianlin Shi<sup>\*a, d</sup>

### Characterization of QM-COOH

<sup>1</sup>H NMR (400 MHz, CDCl<sub>3</sub>, ppm): δ=1.41 (t, *J* = 8.0 Hz, 3H, -NCH<sub>2</sub>CH<sub>3</sub>), 4.59 (q, *J* = 8.0 Hz, 2H, -NCH<sub>2</sub>CH<sub>3</sub>), 7.04 (s, 1H, pyrrole-H), 7.45 (d, *J* = 16.0 Hz, 1H, alkene-H), 7.58 (d, *J* = 16.0 Hz, 1H, alkene-H), 7.63 (t, *J* = 8.0 Hz, 1H, phenyl-H), 7.76 (d, *J* = 8.0 Hz, 2H, phenyl-H), 7.94 (m, 3H), 8.11 (d, *J* = 8.0 Hz, 1H, phenyl-H), 8.94 (d, *J* = 8.0 Hz, 1H, phenyl-H). <sup>13</sup>C NMR (400 MHz, CDCl<sub>3</sub>, ppm): δ= 13.97, 15.02, 29.72, 43.99, 50.78, 107.20, 116.13, 116.67, 119.36, 120.35, 121.51, 123.16, 123.22, 124.62, 126.88, 129.21, 129.24, 129.36, 132.98, 133.18, 133.24, 135.83, 137.40, 138.13, 139.91, 147.04, 147.50, 147.56, 153.19. HRMS (TOF-ESI<sup>-</sup>): *m/z* calcd for C<sub>23</sub>H<sub>16</sub>N<sub>3</sub>O<sub>2</sub> [M-H<sup>+</sup>]: 366.1243; found: 366.1240.

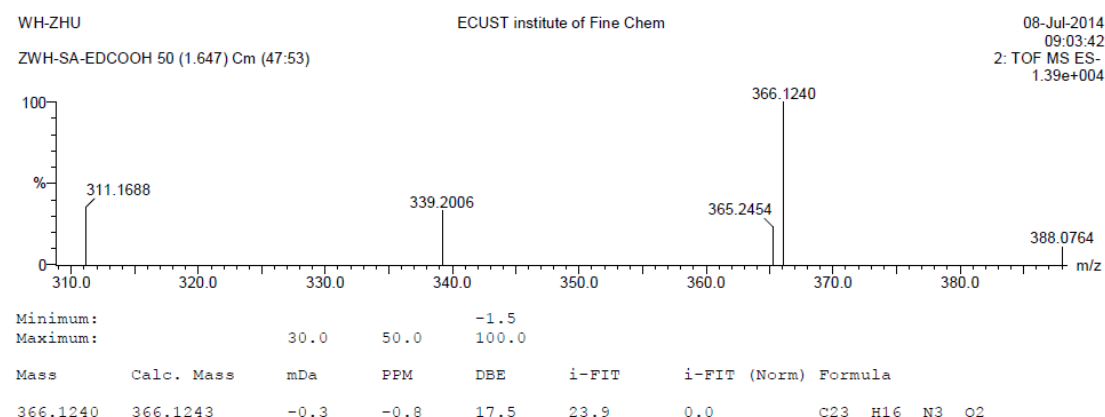

Figure S1. MS spectrum of QM-COOH.

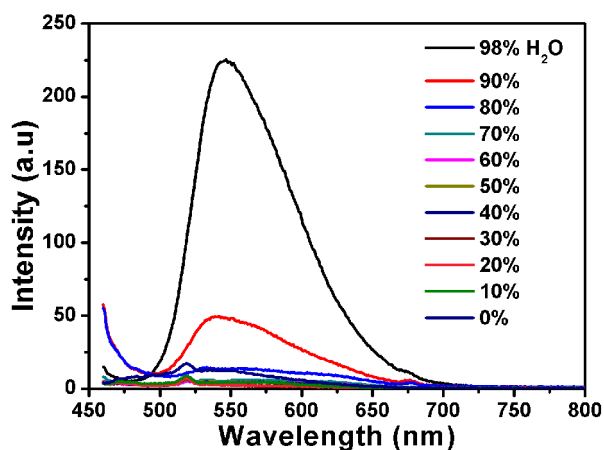

Figure S2 Photoluminescence (PL) spectra of QM-COOH in H<sub>2</sub>O/THF mixtures with different volume fractions of water

**Long-Term Cell Tracing.** MCF-7 cells were seeded into 6-well plate at a density of  $10^4$  cells per well, then MCF-7 cells were incubated at  $37^\circ\text{C}$  with  $5\% \text{CO}_2$  for 24 h. The medium was removed and cells were washed with PBS buffer solution ( $\text{pH}=7.4$ ). The cells then were incubated with FMSNs at  $50, 100, 100 \mu\text{g mL}^{-1}$  for 24 h. (first day) Then cells were washed with PBS for several times and trypsinized. Part of the digestive cells were used for analyzed by flow cytometer, the remaining cells were resuspended and then incubated at  $37^\circ\text{C}$  with  $5\% \text{CO}_2$  for another 24 h. (second day ). So did the third day.

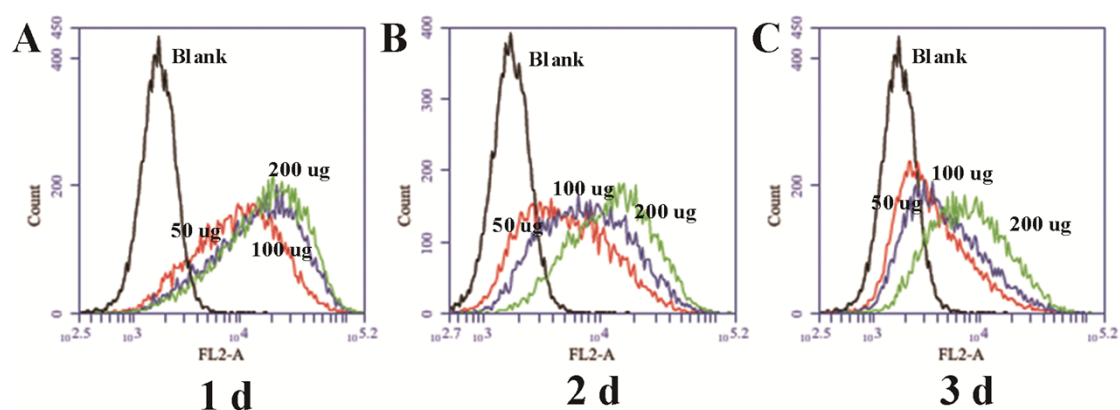

Figure S3. Flow cytometry histograms of MCF-7 breast cancer cells after incubation with  $0 \mu\text{g mL}^{-1}$ ,  $50 \mu\text{g mL}^{-1}$ ,  $100 \mu\text{g mL}^{-1}$  and  $200 \mu\text{g mL}^{-1}$  of FMSNs. (A) 1 day, (B) 2 days and (C) 3 days.

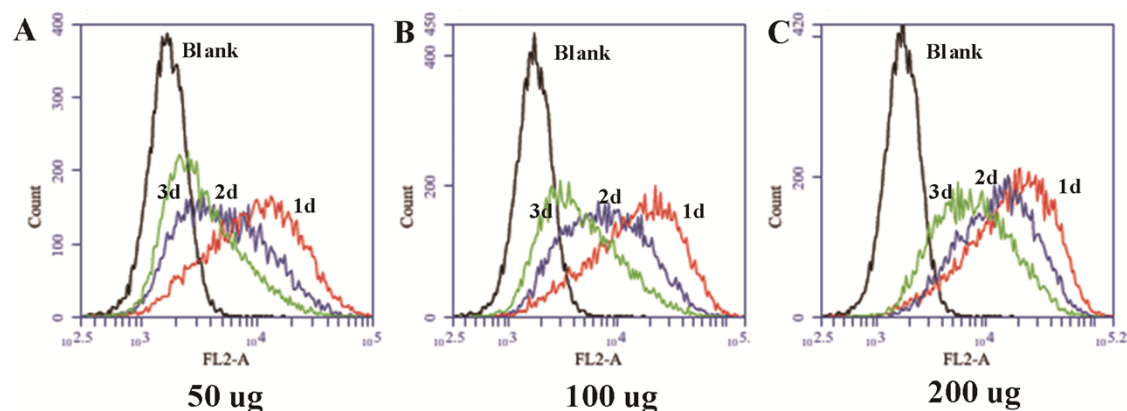

Figure S4 Flow cytometry histograms of MCF-7 breast cancer cells after incubation for 1 day, 2 days and 3 days. (A)  $50 \mu\text{g mL}^{-1}$  (B)  $100 \mu\text{g mL}^{-1}$  and (C)  $200 \mu\text{g mL}^{-1}$  of FMSNs .

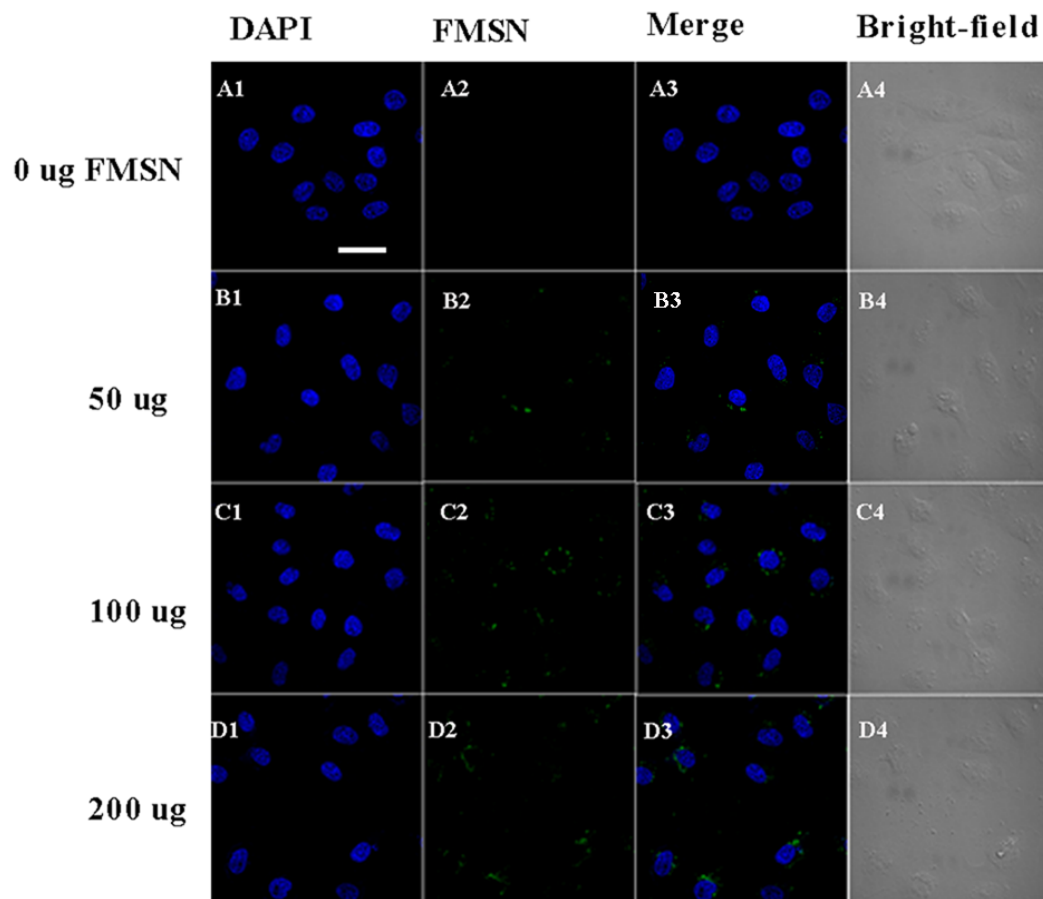

Figure S5 CLSM images of MCF-7 cells incubated with FMSNs for 24 h. The concentrations of FMSNs were (A) 0  $\mu\text{g mL}^{-1}$ , (B) 50  $\mu\text{g mL}^{-1}$ , (C) 100  $\mu\text{g mL}^{-1}$  and (D) 200  $\mu\text{g mL}^{-1}$ . All images share the same scale bar (50  $\mu\text{m}$ ).
